# Supplementary material
Source: publisher figshare collection journal article supplement (https://plos.figshare.com/articles/dataset/_/5366752)
Supplement: Supplementary file [file 1]

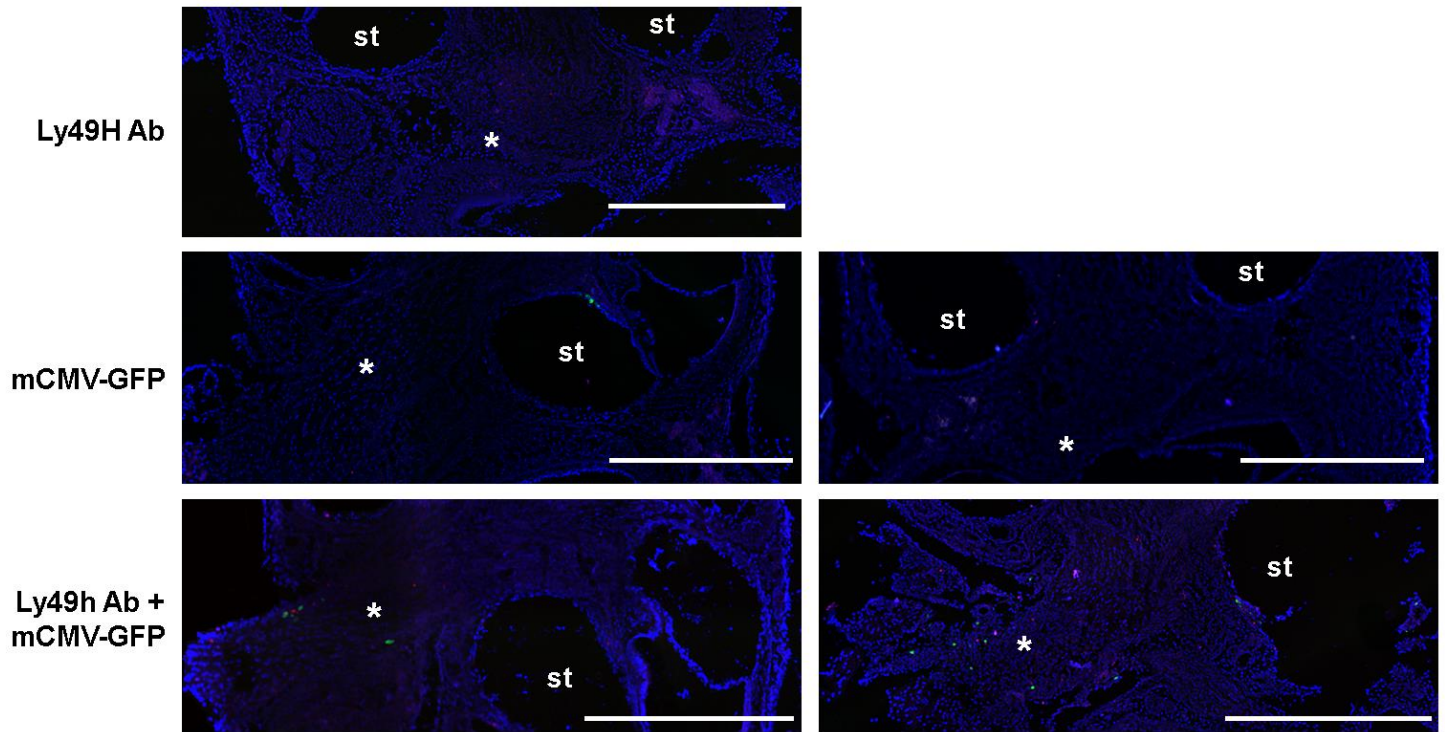

**S2 Fig. mCMV-GFP infection results in NK cell recruitment in mouse cochlea.**

Green fluorescent protein expressed in mCMV-GFP infected cells and red fluorescent protein expressed in NK cells were visualized in cochlear cryosections from NK1.1-tdTomato knock-in mouse temporal bones harvested 3 days post-injection using anti-GFP (green) and anti-RFP antibodies (red). Images are shown for additional NK1.1-tdTomato knock-in mice injected with anti-Ly49H antibody only, mCMV-GFP only, or both anti-Ly49H antibody and mCMV-GFP. Asterisks indicate comparable area of the spiral ganglion region. Scale bars represent 500  $\mu$ m. st = scala tympani
