# Supplementary material
Source: publisher figshare collection journal article supplement (https://plos.figshare.com/articles/dataset/_/5366752)
Supplement: Supplementary file [file 1]

**S1 Table. DPOAE and ABR statistical comparisons between groups.**

Comparisons were modeled over all frequencies by the Kruskal-Wallis test.

| Strain  | Treatment                   | N  | DPOAE Model ( <i>P</i> -values) | ABR Model ( <i>P</i> -values) |
|---------|-----------------------------|----|---------------------------------|-------------------------------|
| C57BL/6 | uninfected (IC carrier)     | 6  |                                 |                               |
| C57BL/6 | mCMV-GFP                    | 12 | <0.005                          | 0.664                         |
| BALB/c  | uninfected (IC carrier)     | 7  |                                 |                               |
| BALB/c  | mCMV-GFP                    | 6  | <0.0001                         | <0.0001                       |
| C57BL/6 | mCMV-GFP                    | 12 |                                 |                               |
| BALB/c  | mCMV-GFP                    | 6  | <0.0001                         | <0.0001                       |
| C57BL/6 | IgG Ab + mCMV-GFP (4 wks)   | 12 |                                 |                               |
| C57BL/6 | mCMV-GFP (4 wks)            | 12 | 0.230                           | 0.782                         |
| C57BL/6 | IgG Ab + mCMV-GFP (4 wks)   | 12 |                                 |                               |
| C57BL/6 | Ly49H Ab + mCMV-GFP (4 wks) | 8  | <0.0001                         | <0.0001                       |
| C57BL/6 | Ly49H Ab + mCMV-GFP (4 wks) | 8  |                                 |                               |
| C57BL/6 | Ly49H Ab + mCMV-GFP (6 wks) | 6  | <0.0001                         | <0.0001                       |
| C57BL/6 | mCMV WT1                    | 6  |                                 |                               |
| C57BL/6 | mCMV $\Delta$ m157          | 12 | <0.0001                         | <0.0001                       |
