# Supplementary material
Source: publisher figshare collection journal article supplement (https://plos.figshare.com/articles/dataset/_/5366752)
Supplement: Supplementary file [file 1]

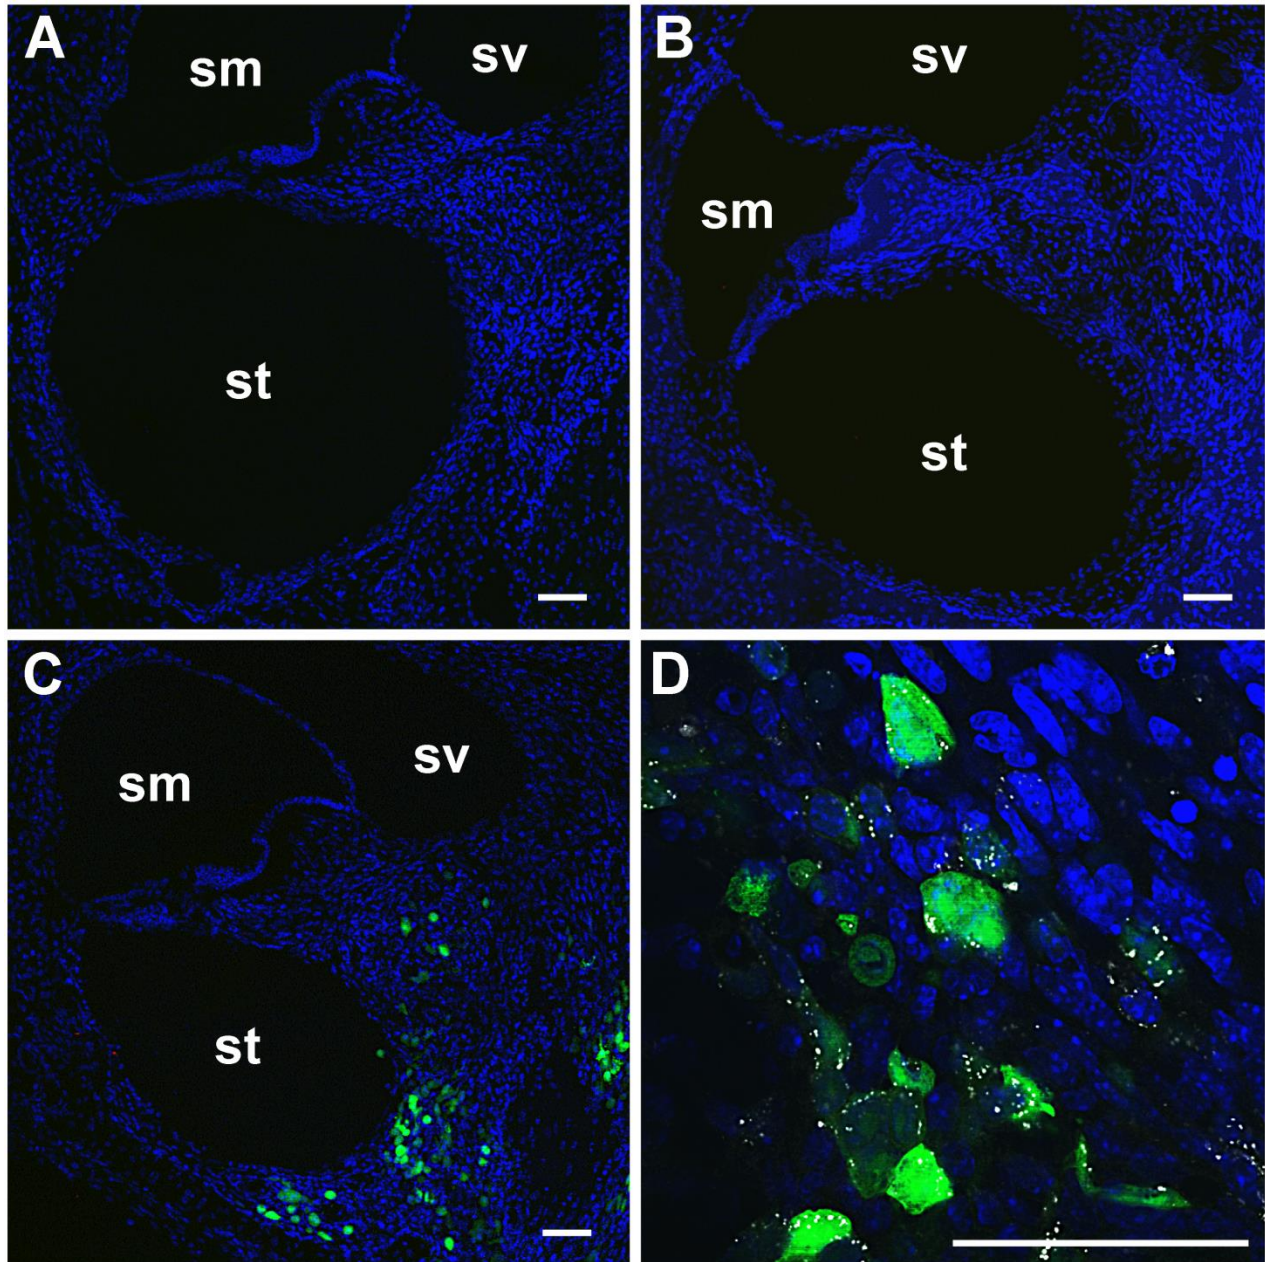

**S4 Fig. mCMV-GFP infected cells activate apoptotic cascade.**

Cochlear cryosections from mice treated with Ly49H blocking antibody only (A), 200 pfu mCMV-GFP inoculation at P3 only (B) or both Ly49H blocking antibody and mCMV-GFP (C) were evaluated 3 days post-injection using anti-cleaved caspase-3 antibodies (white). Cleaved caspase signal appears co-localized with cells expressing native GFP signal, indicating mCMV infection (green). Panel D depicts a higher magnification of the spiral ganglion from the Ly49H+mCMV-GFP treated group. Representative images of 3-4 cochleae per group are shown. Scale bars indicate 50  $\mu$ m. st = scala tympani, sm = scala media, sv = scala vestibuli
